# Supplementary material for: Differential RISC association of endogenous human microRNAs predicts their inhibitory potential
Source: PubMed Central journal article supplement (PMC3985621; doi:10.1093/nar/gkt1393), 2014-01-23
Supplement: supp_gkt1393_nar-03404-y-2013-File008.pdf [file supp_gkt1393_nar-03404-y-2013-File008.pdf]

**Figure S1.** The level of expression of miRNAs present in RISC in 293 cells was determined by immunoprecipitation using the distinct pan-Ago monoclonal antibodies 2A8 and ab57113, followed by deep sequencing. This graph, derived as described in Figure 1, shows that there is a tight correlation between the level of expression detected using either antibody.

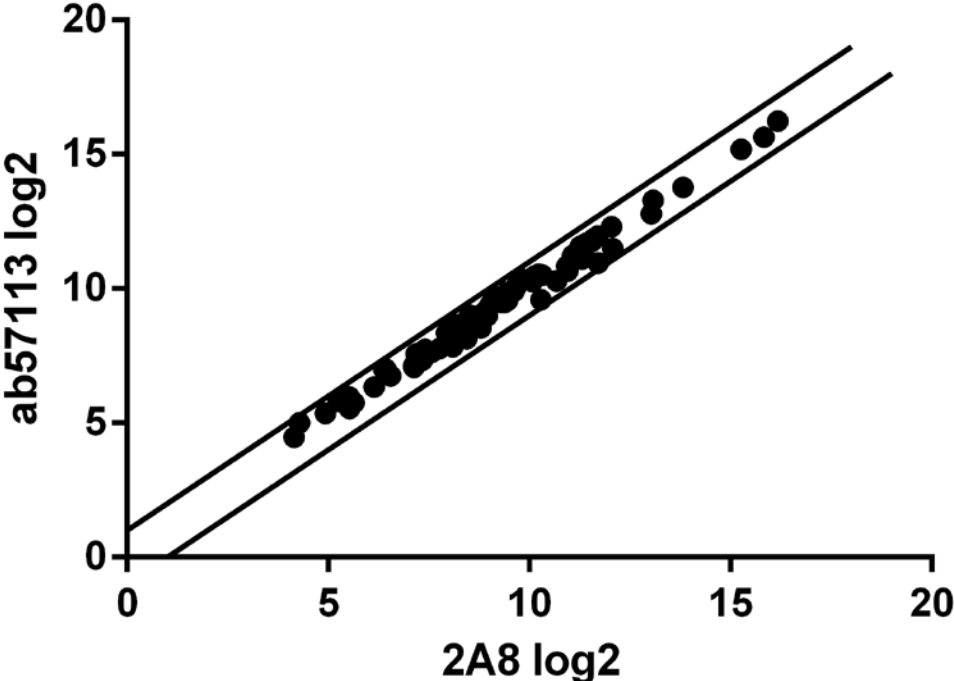

**Figure S2.** The level of total Ago protein immunoprecipitated in this study was determined using Ab57113 for immunoprecipitation, as described below, and the 2A8 antibody for Western blot analysis. This Western shows that the vast majority of expressed Ago protein, and hence the associated miRNAs, are solubilized and recovered using the described IP method.

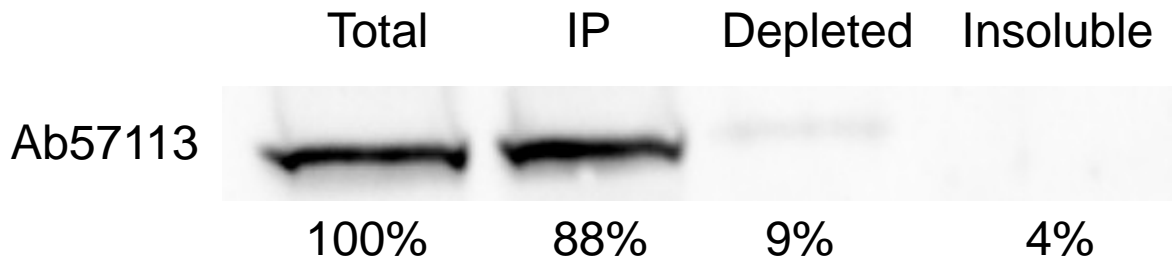

#### Methods

This Ago immunoprecipitation was performed as described in Materials and Methods for miRNA recovery. Briefly,  $5 \times 10^7$  cells were lysed in lysis buffer and then centrifuged to remove any particulate matter. The resultant pellet was then placed in loading dye (2% SDS, 10% glycerol, 0.5% bromophenol blue, 0.06 M TRIS-HCl pH 6.8 and 5%  $\beta$ -mercaptoethanol) and incubated at 95°C for 30 minutes. A portion of this lysate was retained as “total lysate” and the remainder incubated with protein G beads pre-loaded with the pan-Ago antibody ab57113 at 4°C overnight on a rotator. Next day, the protein G beads were isolated by centrifugation and the depleted supernatant removed. Equal portions of total lysate, depleted lysate and protein G beads (IP) were then mixed with loading dye or 2x loading dye and incubated at 95°C for 5 minutes. Equal aliquots of total lysate, depleted lysate, protein G beads (IP) and insoluble fraction were then loaded onto a 4-20% TRIS-HCl gel and subjected to electrophoresis. The gel was then used for a Western blot using the 2A8 pan-Ago monoclonal antibody (Diagenode) and an anti-mouse secondary antibody (Sigma A9044), visualized using ECL according to the manufacturer’s directions (Advansta, Western Bright K-12043-D20) and quantified using a Syngene GBox with background subtracted.

**Figure S3. Effect of 3' tailing on the level of Ago binding of microRNAs.** This figure lists all miRNAs that contribute >0.1% of the total or RISC-associated miRNA pool, in descending order of their level of RISC association in 293 cells (A) or A549 cells (B). The x-axis presents the ratio of the percentage of tailed miRNAs observed in the Total vs. RISC-associated miRNA pool.

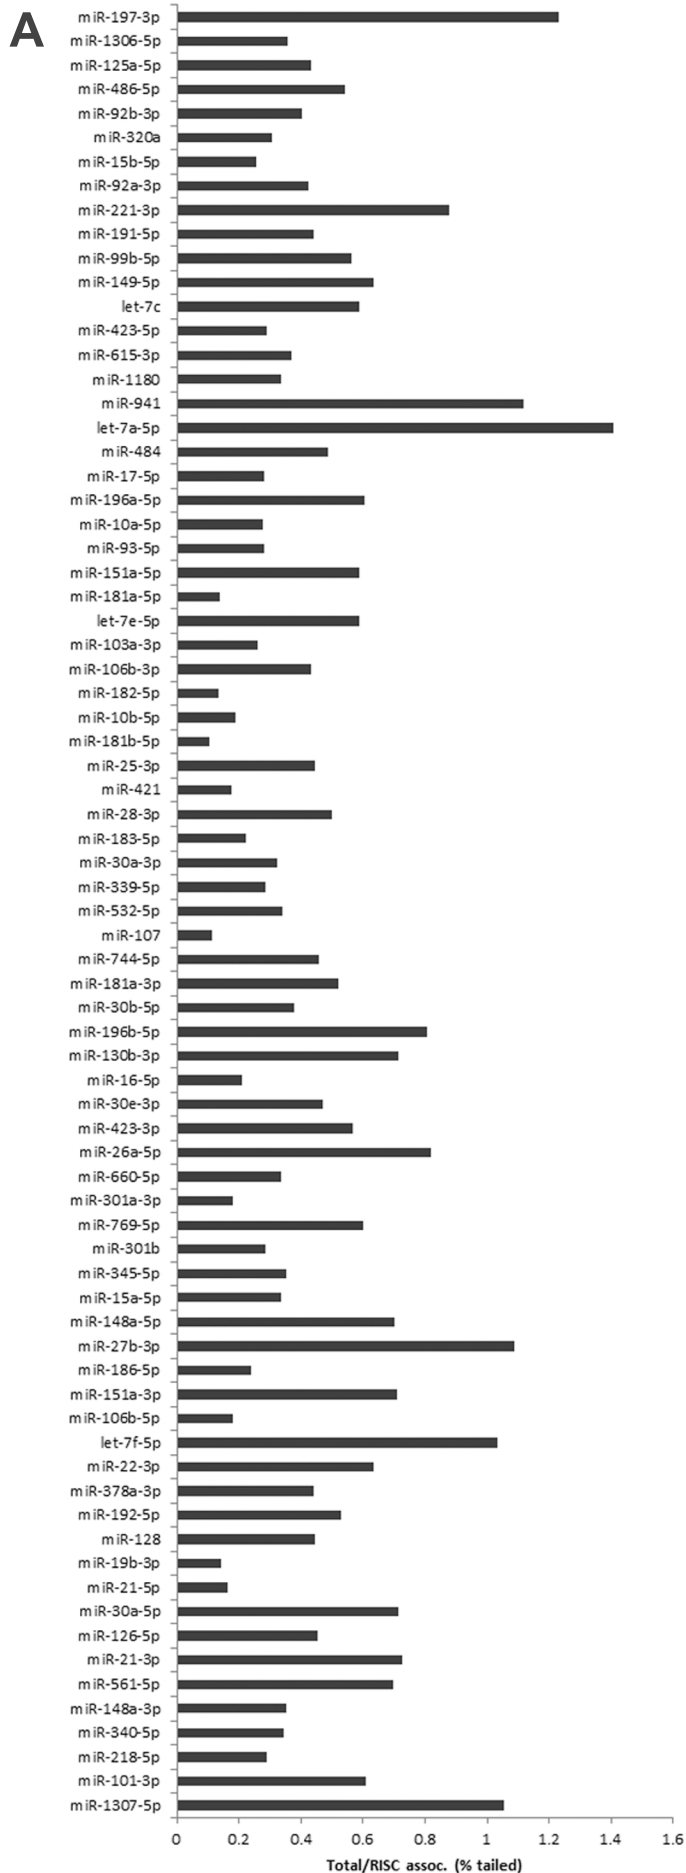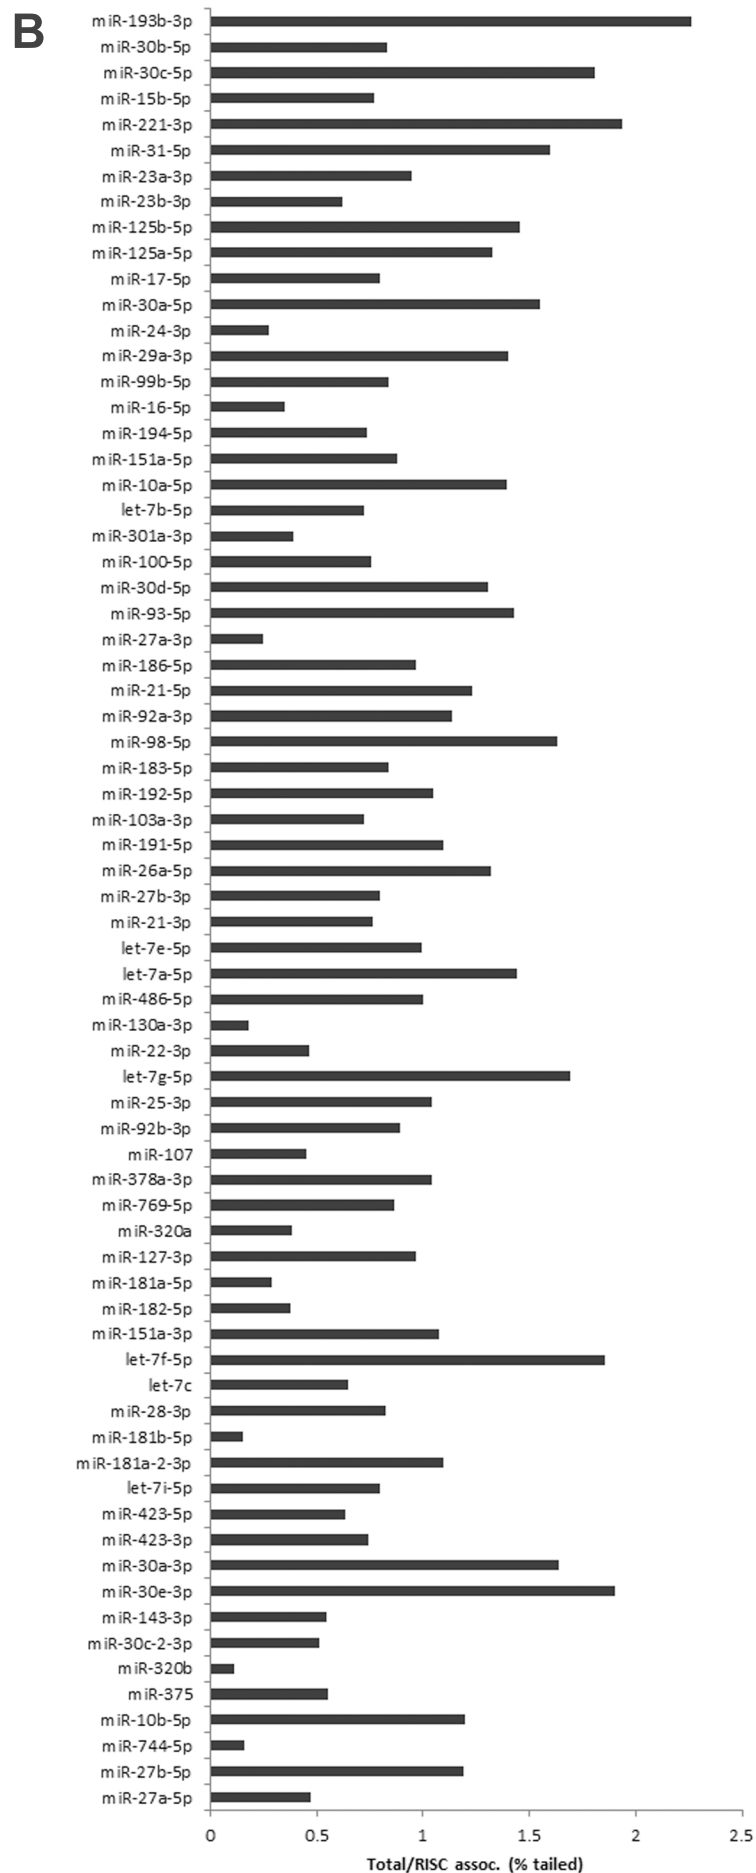

**Table S1.** Level of RISC association of endogenous miRNAs expressed in 293 cells.

| 293/2A8     | % Total miRNA pool | % RISC-assoc. pool | Ratio | 293/2A8     | % Total miRNA pool | % RISC-assoc. pool | Ratio |
|-------------|--------------------|--------------------|-------|-------------|--------------------|--------------------|-------|
| miR-197-3p  | 0.02%              | 1.21%              | 59.33 | miR-423-3p  | 2.24%              | 0.85%              | 0.38  |
| miR-1306-5p | 0.00%              | 0.14%              | 59.01 | miR-26a-5p  | 2.12%              | 0.79%              | 0.37  |
| miR-125a-5p | 0.10%              | 0.92%              | 9.34  | miR-660-5p  | 0.15%              | 0.05%              | 0.34  |
| miR-486-5p  | 0.07%              | 0.45%              | 6.04  | miR-301a-3p | 0.41%              | 0.13%              | 0.33  |
| miR-92b-3p  | 0.51%              | 3.04%              | 5.94  | miR-769-5p  | 1.26%              | 0.39%              | 0.31  |
| miR-320a    | 0.15%              | 0.72%              | 4.80  | miR-301b    | 0.11%              | 0.03%              | 0.29  |
| miR-15b-5p  | 0.05%              | 0.19%              | 3.61  | miR-345-5p  | 0.32%              | 0.09%              | 0.28  |
| miR-92a-3p  | 5.98%              | 21.10%             | 3.53  | miR-15a-5p  | 0.11%              | 0.03%              | 0.28  |
| miR-221-3p  | 0.13%              | 0.41%              | 3.10  | miR-148a-5p | 0.19%              | 0.05%              | 0.27  |
| miR-191-5p  | 1.71%              | 5.23%              | 3.06  | miR-27b-3p  | 1.81%              | 0.44%              | 0.24  |
| miR-99b-5p  | 0.37%              | 1.10%              | 2.97  | miR-186-5p  | 1.06%              | 0.24%              | 0.23  |
| miR-149-5p  | 0.06%              | 0.16%              | 2.88  | miR-151a-3p | 0.61%              | 0.13%              | 0.22  |
| let-7c      | 0.06%              | 0.17%              | 2.83  | miR-106b-5p | 0.16%              | 0.03%              | 0.21  |
| miR-423-5p  | 0.58%              | 1.56%              | 2.68  | let-7f-5p   | 1.50%              | 0.32%              | 0.21  |
| miR-615-3p  | 0.05%              | 0.13%              | 2.65  | miR-22-3p   | 5.38%              | 1.00%              | 0.19  |
| miR-1180    | 0.05%              | 0.12%              | 2.60  | miR-378a-3p | 0.90%              | 0.17%              | 0.18  |
| miR-941     | 0.19%              | 0.46%              | 2.42  | miR-192-5p  | 1.69%              | 0.28%              | 0.17  |
| let-7a-5p   | 0.58%              | 0.90%              | 1.55  | miR-128     | 0.48%              | 0.08%              | 0.16  |
| miR-484     | 0.10%              | 0.13%              | 1.36  | miR-19b-3p  | 0.11%              | 0.02%              | 0.15  |
| miR-17-5p   | 0.09%              | 0.11%              | 1.27  | miR-21-5p   | 0.44%              | 0.06%              | 0.14  |
| miR-196a-5p | 0.08%              | 0.10%              | 1.26  | miR-378c    | 0.13%              | 0.02%              | 0.13  |
| miR-10a-5p  | 23.68%             | 26.75%             | 1.13  | miR-30a-5p  | 0.14%              | 0.02%              | 0.12  |
| miR-93-5p   | 0.84%              | 0.94%              | 1.11  | miR-126-5p  | 0.23%              | 0.03%              | 0.11  |
| miR-151a-5p | 0.24%              | 0.26%              | 1.06  | miR-21-3p   | 0.16%              | 0.01%              | 0.09  |
| miR-181a-5p | 0.94%              | 0.98%              | 1.04  | miR-561-5p  | 0.21%              | 0.02%              | 0.08  |
| let-7e-5p   | 0.22%              | 0.23%              | 1.02  | miR-148a-3p | 3.68%              | 0.30%              | 0.08  |
| miR-103a-3p | 1.21%              | 1.20%              | 0.99  | miR-340-5p  | 0.66%              | 0.05%              | 0.08  |
| miR-106b-3p | 0.11%              | 0.10%              | 0.94  | miR-218-5p  | 0.13%              | 0.01%              | 0.06  |
| miR-182-5p  | 1.64%              | 1.53%              | 0.93  | miR-101-3p  | 0.16%              | 0.01%              | 0.04  |
| miR-10b-5p  | 17.41%             | 14.26%             | 0.82  | miR-1307-5p | 0.34%              | 0.01%              | 0.03  |
| miR-181b-5p | 0.32%              | 0.25%              | 0.79  |             |                    |                    |       |
| miR-25-3p   | 4.29%              | 3.14%              | 0.73  |             |                    |                    |       |
| miR-421     | 0.26%              | 0.18%              | 0.70  |             |                    |                    |       |
| miR-28-3p   | 1.06%              | 0.71%              | 0.67  |             |                    |                    |       |
| miR-183-5p  | 0.15%              | 0.10%              | 0.66  |             |                    |                    |       |
| miR-30a-3p  | 0.22%              | 0.14%              | 0.64  |             |                    |                    |       |
| miR-339-5p  | 0.12%              | 0.07%              | 0.60  |             |                    |                    |       |
| miR-532-5p  | 0.32%              | 0.18%              | 0.58  |             |                    |                    |       |
| miR-107     | 0.39%              | 0.21%              | 0.55  |             |                    |                    |       |
| miR-744-5p  | 1.11%              | 0.59%              | 0.53  |             |                    |                    |       |
| miR-181a-3p | 0.24%              | 0.13%              | 0.53  |             |                    |                    |       |
| miR-30b-5p  | 0.12%              | 0.06%              | 0.50  |             |                    |                    |       |
| miR-196b-5p | 0.48%              | 0.21%              | 0.45  |             |                    |                    |       |
| miR-130b-3p | 0.22%              | 0.10%              | 0.44  |             |                    |                    |       |
| miR-16-5p   | 2.75%              | 1.12%              | 0.41  |             |                    |                    |       |
| miR-30e-3p  | 0.25%              | 0.10%              | 0.41  |             |                    |                    |       |

This table lists all miRNAs expressed in 293 cells at >0.1% of the total or RISC-associated miRNA pool, 76 in total, in order of their level of RISC association, with the most highly RISC-associated listed first. In particular, this table presents the level of expression of each miRNA as a percentage of the total miRNA pool (column 2) and RISC-associated miRNA pool (column 3) and then gives the ratio of these two numbers (column 4). The miRNAs functionally analyzed in Fig. 3 are shown in yellow.

**Table S2.** Level of RISC association of endogenous miRNAs expressed in A549 cells.

| A549/ab57113 | % Total miRNA pool | % RISC-<br>assoc. pool | Ratio | A549/ab57113  | % Total miRNA pool | % RISC-<br>assoc. pool | Ratio |
|--------------|--------------------|------------------------|-------|---------------|--------------------|------------------------|-------|
| miR-193b-3p  | 0.01%              | 0.70%                  | 64.76 | miR-769-5p    | 0.22%              | 0.17%                  | 0.75  |
| miR-30b-5p   | 0.02%              | 0.22%                  | 11.56 | miR-320a      | 0.53%              | 0.40%                  | 0.75  |
| miR-30c-5p   | 0.02%              | 0.17%                  | 8.47  | miR-127-3p    | 0.30%              | 0.22%                  | 0.72  |
| miR-15b-5p   | 0.03%              | 0.26%                  | 7.75  | miR-181a-5p   | 2.99%              | 2.12%                  | 0.71  |
| miR-221-3p   | 0.14%              | 0.93%                  | 6.61  | miR-182-5p    | 4.13%              | 2.89%                  | 0.70  |
| miR-31-5p    | 0.04%              | 0.20%                  | 5.53  | miR-151a-3p   | 0.64%              | 0.32%                  | 0.50  |
| miR-23a-3p   | 0.06%              | 0.29%                  | 4.62  | let-7f-5p     | 3.34%              | 1.62%                  | 0.48  |
| miR-23b-3p   | 0.07%              | 0.31%                  | 4.55  | let-7c        | 0.18%              | 0.09%                  | 0.48  |
| miR-125b-5p  | 0.05%              | 0.22%                  | 4.54  | miR-28-3p     | 2.98%              | 1.40%                  | 0.47  |
| miR-125a-5p  | 0.52%              | 2.15%                  | 4.13  | miR-181b-5p   | 0.50%              | 0.22%                  | 0.44  |
| miR-17-5p    | 0.03%              | 0.11%                  | 3.98  | miR-181a-2-3p | 0.53%              | 0.23%                  | 0.43  |
| miR-30a-5p   | 0.12%              | 0.38%                  | 3.20  | let-7i-5p     | 6.63%              | 2.50%                  | 0.38  |
| miR-24-3p    | 0.05%              | 0.15%                  | 3.20  | miR-423-5p    | 0.64%              | 0.21%                  | 0.34  |
| miR-29a-3p   | 0.06%              | 0.16%                  | 2.77  | miR-423-3p    | 0.86%              | 0.25%                  | 0.30  |
| miR-99b-5p   | 0.69%              | 1.89%                  | 2.74  | miR-30a-3p    | 1.57%              | 0.41%                  | 0.26  |
| miR-16-5p    | 0.66%              | 1.72%                  | 2.60  | miR-30e-3p    | 0.30%              | 0.06%                  | 0.19  |
| miR-194-5p   | 0.12%              | 0.30%                  | 2.44  | miR-143-3p    | 0.24%              | 0.04%                  | 0.18  |
| miR-151a-5p  | 0.35%              | 0.83%                  | 2.34  | miR-30c-2-3p  | 0.13%              | 0.02%                  | 0.18  |
| miR-10a-5p   | 2.88%              | 6.60%                  | 2.29  | miR-320b      | 0.39%              | 0.06%                  | 0.16  |
| let-7b-5p    | 0.19%              | 0.39%                  | 2.06  | miR-375       | 0.10%              | 0.01%                  | 0.14  |
| miR-301a-3p  | 0.05%              | 0.10%                  | 2.02  | miR-10b-5p    | 13.00%             | 1.73%                  | 0.13  |
| miR-100-5p   | 0.23%              | 0.45%                  | 1.95  | miR-744-5p    | 0.43%              | 0.05%                  | 0.12  |
| miR-30d-5p   | 0.06%              | 0.11%                  | 1.94  | miR-27b-5p    | 0.94%              | 0.10%                  | 0.10  |
| miR-93-5p    | 0.31%              | 0.57%                  | 1.82  | miR-27a-5p    | 0.15%              | 0.01%                  | 0.04  |
| miR-27a-3p   | 0.22%              | 0.39%                  | 1.78  |               |                    |                        |       |
| miR-186-5p   | 0.11%              | 0.19%                  | 1.75  |               |                    |                        |       |
| miR-21-5p    | 3.11%              | 5.27%                  | 1.69  |               |                    |                        |       |
| miR-92a-3p   | 4.03%              | 6.66%                  | 1.65  |               |                    |                        |       |
| miR-98-5p    | 0.11%              | 0.16%                  | 1.47  |               |                    |                        |       |
| miR-183-5p   | 0.08%              | 0.11%                  | 1.42  |               |                    |                        |       |
| miR-192-5p   | 8.29%              | 11.72%                 | 1.41  |               |                    |                        |       |
| miR-103a-3p  | 0.62%              | 0.86%                  | 1.40  |               |                    |                        |       |
| miR-191-5p   | 3.48%              | 4.56%                  | 1.31  |               |                    |                        |       |
| miR-26a-5p   | 1.08%              | 1.39%                  | 1.29  |               |                    |                        |       |
| miR-27b-3p   | 10.94%             | 14.04%                 | 1.28  |               |                    |                        |       |
| miR-21-3p    | 2.01%              | 2.31%                  | 1.15  |               |                    |                        |       |
| let-7e-5p    | 0.63%              | 0.68%                  | 1.09  |               |                    |                        |       |
| let-7a-5p    | 2.49%              | 2.58%                  | 1.04  |               |                    |                        |       |
| miR-486-5p   | 0.22%              | 0.23%                  | 1.03  |               |                    |                        |       |
| miR-130a-3p  | 0.16%              | 0.15%                  | 0.97  |               |                    |                        |       |
| miR-22-3p    | 7.83%              | 7.38%                  | 0.94  |               |                    |                        |       |
| let-7g-5p    | 0.23%              | 0.21%                  | 0.93  |               |                    |                        |       |
| miR-25-3p    | 1.74%              | 1.59%                  | 0.91  |               |                    |                        |       |
| miR-92b-3p   | 1.52%              | 1.30%                  | 0.86  |               |                    |                        |       |
| miR-107      | 0.17%              | 0.15%                  | 0.85  |               |                    |                        |       |
| miR-378a-3p  | 0.16%              | 0.13%                  | 0.79  |               |                    |                        |       |

Identical to Table S1, except that these data are derived from A549 cells. MiRNAs highlighted in yellow were functionally analyzed in Fig. 4.

**Table S3.** Variable levels of 3' tailing of endogenous miRNAs in 293 cells.

| <b>miRNA</b>      | <b>Total miRNA pool</b> |                     |                 | <b>RISC-associated miRNA pool</b> |                     |                 |
|-------------------|-------------------------|---------------------|-----------------|-----------------------------------|---------------------|-----------------|
|                   | <b>Mature Reads</b>     | <b>Tailed Reads</b> | <b>% Tailed</b> | <b>Mature Reads</b>               | <b>Tailed Reads</b> | <b>% Tailed</b> |
| <b>miR-101-3p</b> | 18,992                  | 7,600               | 28.58           | 1,113                             | 937                 | 45.71           |
| <b>miR-191-5p</b> | 206,793                 | 2,082               | 1.00            | 703,602                           | 12,176              | 1.70            |
| <b>miR-197-3p</b> | 2,471                   | 60                  | 2.37            | 100,104                           | 1,774               | 1.74            |
| <b>miR-22-3p</b>  | 652,330                 | 1,368               | 0.21            | 167,484                           | 489                 | 0.29            |
| <b>miR-27b-3p</b> | 218,903                 | 19,974              | 8.36            | 74,298                            | 5,149               | 6.48            |
| <b>miR-92a-3p</b> | 724,973                 | 96,462              | 11.74           | 2,561,703                         | 912,755             | 26.27           |

This table shows the number of total mature miRNA reads obtained for each of the indicated human miRNAs in either the total or RISC-associated miRNA pool, and the number of these reads that show 3' tails. These reads are then also given as a percentage of the total reads in each miRNA pool.

**Table S4.** Sequence of tails observed in selected miRNAs in 293 cells.**miR-92a-3p Total**

| <b>Tailed Read Sequence</b>                | Number of Reads         |
|--------------------------------------------|-------------------------|
| <b><u>TATTGCACTTGTCCCGGCCTGT</u>UGAGUU</b> | <b>Hairpin sequence</b> |
| TATTGCACTTGTCCCGGCCTG <b>TAA</b>           | 24,060                  |
| TATTGCACTTGTCCCGGCCTG <b>TA</b>            | 23,590                  |
| TATTGCACTTGTCCCGGCCTG <b>TAT</b>           | 15,725                  |
| TATTGCACTTGTCCCGGCCTG <b>T C</b>           | 6,741                   |
| TATTGCACTTGTCCCGGCCTG <b>CA</b>            | 5,754                   |
| TATTGCACTTGTCCCGGCCTG <b>TT</b>            | 3,645                   |
| TATTGCACTTGTCCCGGCCTG <b>CT</b>            | 3,545                   |
| TATTGCACTTGTCCCGGCCTG <b>TAG</b>           | 2,540                   |
| TATTGCACTTGTCCCGGCCTG <b>TAC</b>           | 2,056                   |
| TATTGCACTTGTCCCGGCCTG <b>TA</b>            | 1,416                   |

**miR-92a-3p RISC-associated**

| <b>Tailed Read Sequence</b>                | Number of Reads         |
|--------------------------------------------|-------------------------|
| <b><u>TATTGCACTTGTCCCGGCCTGT</u>UGAGUU</b> | <b>Hairpin sequence</b> |
| TATTGCACTTGTCCCGGCCTG <b>TAA</b>           | 261,409                 |
| TATTGCACTTGTCCCGGCCTG <b>TAT</b>           | 161,291                 |
| TATTGCACTTGTCCCGGCCTG <b>TA</b>            | 140,928                 |
| TATTGCACTTGTCCCGGCCTG <b>CA</b>            | 61,999                  |
| TATTGCACTTGTCCCGGCCTG <b>T C</b>           | 40,118                  |
| TATTGCACTTGTCCCGGCCTG <b>CT</b>            | 35,852                  |
| TATTGCACTTGTCCCGGCCTG <b>TAC</b>           | 26,861                  |
| TATTGCACTTGTCCCGGCCTG <b>TT</b>            | 26,179                  |
| TATTGCACTTGTCCCGGCCTG <b>T AAT</b>         | 22,523                  |
| TATTGCACTTGTCCCGGCCTG <b>TAG</b>           | 22,470                  |

**miR-22-3p Total**

| <b>Tailed Read Sequence</b>               | Number of Reads         |
|-------------------------------------------|-------------------------|
| <b><u>AAGCTGCCAGTTGAAGAACTGT</u>TCCCT</b> | <b>Hairpin sequence</b> |
| AAGCTGCCAGTTGAAGAACTG <b>TA</b>           | 1,087                   |
| AAGCTGCCAGTTGAAGAACTG <b>T C</b>          | 236                     |
| AAGCTGCCAGTTGAAGAACTG <b>TAA</b>          | 14                      |
| AAGCTGCCAGTTGAAGAACTG <b>TTA</b>          | 10                      |
| AAGCTGCCAGTTGAAGAACTG <b>TG</b>           | 5                       |
| AAGCTGCCAGTTGAAGAACTG <b>TAT</b>          | 5                       |

**miR-22-3p RISC-associated**

| <b>Tailed Read Sequence</b>               | Number of Reads         |
|-------------------------------------------|-------------------------|
| <b><u>AAGCTGCCAGTTGAAGAACTGT</u>TCCCT</b> | <b>Hairpin sequence</b> |
| AAGCTGCCAGTTGAAGAACTG <b>TA</b>           | 383                     |
| AAGCTGCCAGTTGAAGAACTG <b>T C</b>          | 77                      |
| AAGCTGCCAGTTGAAGAACTG <b>TAA</b>          | 8                       |
| AAGCTGCCAGTTGAAGAACTG <b>TTA</b>          | 5                       |

**miR-197-3p RISC-associated**

| <b>Tailed Read Sequence</b>                | Number of Reads         |
|--------------------------------------------|-------------------------|
| <b><u>TTCACCACCTTCTCCACCCAGC</u>ATGGCC</b> | <b>Hairpin sequence</b> |
| TTCACCACCTTCTCCACCCAG <b>CT</b>            | 779                     |
| TTCACCACCTTCTCCACCCAG <b>CC</b>            | 410                     |
| TTCACCACCTTCTCCACCCAG <b>CAA</b>           | 105                     |
| TTCACCACCTTCTCCACCCAG <b>CCT</b>           | 52                      |
| TTCACCACCTTCTCCACCCAG <b>CTT</b>           | 39                      |
| TTCACCACCTTCTCCACCCAG <b>CAAT</b>          | 37                      |
| TTCACCACCTTCTCCACCCAG <b>CG</b>            | 32                      |
| TTCACCACCTTCTCCACCCAG <b>CATT</b>          | 28                      |
| TTCACCACCTTCTCCACCCAG <b>CAAA</b>          | 26                      |
| TTCACCACCTTCTCCACCCAG <b>CCA</b>           | 21                      |

**miR-197-3p Total**

| <b>Tailed Read Sequence</b>                | Number of Reads         |
|--------------------------------------------|-------------------------|
| <b><u>TTCACCACCTTCTCCACCCAGC</u>ATGGCC</b> | <b>Hairpin sequence</b> |
| TTCACCACCTTCTCCACCCAG <b>CT</b>            | 32                      |
| TTCACCACCTTCTCCACCCAG <b>CC</b>            | 12                      |

**miR-101-3p Total**

| <b>Tailed Read Sequence</b>              | Number of Reads         |
|------------------------------------------|-------------------------|
| <b><u>TACAGTACTGTGATAACTGA</u>AGGAUG</b> | <b>Hairpin sequence</b> |
| TACAGTACTGTGATAACTG <b>AAT</b>           | 4,005                   |
| TACAGTACTGTGATAACTG <b>AAA</b>           | 2,187                   |
| TACAGTACTGTGATAACTG <b>AAGT</b>          | 715                     |
| TACAGTACTGTGATAACTG <b>AAC</b>           | 408                     |
| TACAGTACTGTGATAACTG <b>AAGC</b>          | 169                     |
| TACAGTACTGTGATAACTG <b>AAAA</b>          | 28                      |
| TACAGTACTGTGATAACTG <b>AATT</b>          | 23                      |
| TACAGTACTGTGATAACTG <b>AAAC</b>          | 20                      |
| TACAGTACTGTGATAACTG <b>AAAT</b>          | 15                      |
| TACAGTACTGTGATAACTG <b>AACT</b>          | 9                       |

**miR-101-3p RISC-associated**

| <b>Tailed Read Sequence</b>              | Number of Reads         |
|------------------------------------------|-------------------------|
| <b><u>TACAGTACTGTGATAACTGA</u>AGGAUG</b> | <b>Hairpin sequence</b> |
| TACAGTACTGTGATAACTG <b>AAT</b>           | 404                     |
| TACAGTACTGTGATAACTG <b>AAGT</b>          | 220                     |
| TACAGTACTGTGATAACTG <b>AAA</b>           | 188                     |
| TACAGTACTGTGATAACTG <b>AAC</b>           | 51                      |
| TACAGTACTGTGATAACTG <b>AAGC</b>          | 36                      |
| TACAGTACTGTGATAACTG <b>AAAA</b>          | 10                      |
| TACAGTACTGTGATAACTG <b>AATT</b>          | 9                       |

This table first presents the sequence of the mature miRNA, and predicted pri-miRNA stem extension, for the human miRNAs miR-92a-3p, miR-197-3p, miR-22-3p and miR-101-3p. It then shows all 3' tailed versions recovered that represent >10% of the total with a minimum of 5 reads, listed by read number observed.

**Table S5.** The level of RISC-association of miRNA guide strands does not predict the level of passenger strand association with RISC.

|                   | Total Reads | % Total miRNA pool | RISC assoc. Reads | % RISC assoc. pool | Ratio |
|-------------------|-------------|--------------------|-------------------|--------------------|-------|
| <b>293 cells</b>  |             |                    |                   |                    |       |
| miR-197-5p        | 7           | <0.001%            | 171               | 0.00%              | 18    |
| miR-197-3p        | 2,471       | 0.02%              | 203,190           | 1.21%              | 59    |
|                   |             |                    |                   |                    |       |
| miR-92a-5p        | 942         | 0.01%              | 1,923             | 0.01%              | 1.5   |
| miR-92a-3p        | 724,973     | 5.98%              | 3,543,926         | 21.10%             | 3.5   |
|                   |             |                    |                   |                    |       |
| miR-22-5p         | 44          | <0.001%            | 133               | 0.00%              | 2.2   |
| miR-22-3p         | 652,330     | 5.38%              | 168,281           | 1.00%              | 0.19  |
|                   |             |                    |                   |                    |       |
| miR-101-5p        | 191         | 0.00%              | 17                | <0.001%            | 0.064 |
| miR-101-3p        | 18,992      | 0.16%              | 1,084             | 0.01%              | 0.041 |
|                   |             |                    |                   |                    |       |
| miR-27b-5p        | 3,702       | 0.03%              | 1,066             | 0.01%              | 0.29  |
| miR-27b-3p        | 218,903     | 1.81%              | 73,306            | 0.44%              | 0.33  |
|                   |             |                    |                   |                    |       |
| <b>A549 cells</b> |             |                    |                   |                    |       |
| miR-125a-5p       | 57,612      | 0.52%              | 223,582           | 2.15%              | 3.9   |
| miR-125a-3p       | 2,160       | 0.02%              | 1,618             | 0.02%              | 0.75  |
|                   |             |                    |                   |                    |       |
| miR-193b-5p       | 197         | <0.001%            | 826               | 0.01%              | 4.2   |
| miR-193b-3p       | 1,195       | 0.01%              | 72,673            | 0.70%              | 61    |
|                   |             |                    |                   |                    |       |
| miR-30a-5p        | 13,170      | 0.12%              | 39,551            | 0.38%              | 3     |
| miR-30a-3p        | 173,817     | 1.57%              | 42,575            | 0.41%              | 0.24  |

This table presents the number of miRNA reads in the total and RISC-associated miRNA pool for both the guide and passenger strands of the endogenous miRNAs functionally analyzed in Figs. 4 and 5. These passenger strands are not listed in Tables S1 and S2, which only list miRNAs that represent >0.1% of the total or RISC-associated miRNA, with the exception of miR-30a-5p.
